# Supplementary material for: Assembly of ZnII-coordination polymers constructed from benzothiadiazole functionalized bipyridines and V-shaped dicarboxylic acids: topology variety, photochemical and visible-light-driven photocatalytic properties
Source: Royal Society of Chemistry journal article supplement (doi:10.1039/c7ce01933e), 2017-12-27
Supplement: c7ce01933e1.pdf [file c7ce01933e1.pdf]

## Electronic Supplementary Information

Assembly of Zn<sup>II</sup>-coordination polymers constructed by benzothiadiazole functionalized bipyridines and V-shaped dicarboxylic acids: topology variety, photochemical and visible-light-driven photocatalytic properties

Wei-Chao Song,<sup>a</sup> Ling Liang,<sup>a</sup> Xun-Zhe Cui,<sup>a</sup> Xiu-Guang Wang,<sup>a</sup> En-Cui Yang<sup>\*a</sup> and Xiao-Jun Zhao<sup>\*ab</sup>

<sup>a</sup> College of Chemistry, Key Laboratory of Inorganic-Organic Hybrid Functional Material Chemistry, Ministry of Education, Tianjin Key Laboratory of Structure and Performance for Functional Molecules, Tianjin Normal University, Tianjin 300387, P. R. China

<sup>b</sup> Collaborative Innovation Center of Chemical Science and Engineering (Tianjin), Tianjin 300071, China

**Table S1** Selected bond lengths (Å) and angles (°) for complexes **1–4**<sup>a</sup>

| <b>1</b>                                      |            |                                               |            |
|-----------------------------------------------|------------|-----------------------------------------------|------------|
| Zn(1)-O(1)                                    | 1.987(4)   | Zn(1)-N(4)                                    | 2.048(5)   |
| Zn(1)-O(2) <sup>#2</sup>                      | 2.076(4)   | Zn(1)-O(1) <sup>#3</sup>                      | 1.987(4)   |
| Zn(1)-O(2) <sup>#1</sup>                      | 2.076(4)   |                                               |            |
| O(1) <sup>#3</sup> -Zn(1)-O(2) <sup>#2</sup>  | 90.00(15)  | O(1) <sup>#3</sup> -Zn(1)-N(4)                | 101.75(12) |
| O(1)-Zn(1)-O(2) <sup>#2</sup>                 | 86.81(15)  | O(2) <sup>#1</sup> -Zn(1)-N(4)                | 97.84(12)  |
| O(1)-Zn(1)-N(4)                               | 101.75(12) | O(2) <sup>#1</sup> -Zn(1)-O(2) <sup>#2</sup>  | 164.3(2)   |
| O(2) <sup>#2</sup> -Zn(1)-N(4)                | 97.84(12)  | O(1) <sup>#3</sup> -Zn(1)-O(2) <sup>#1</sup>  | 86.81(15)  |
| O(1)-Zn(1)-O(2) <sup>#1</sup>                 | 90.01(15)  | O(1)-Zn(1)-O(1) <sup>#3</sup>                 | 156.5(2)   |
| <b>2</b>                                      |            |                                               |            |
| Zn(1)-O(9) <sup>#1</sup>                      | 2.355(4)   | Zn(1)-N(1)                                    | 2.024(4)   |
| Zn(1)-O(1)                                    | 1.956(3)   | Zn(1)-O(10) <sup>#1</sup>                     | 2.000(4)   |
| Zn(1)-O(6)                                    | 1.988(3)   | Zn(2)-O(2)                                    | 2.006(3)   |
| Zn(2)-O(4) <sup>#2</sup>                      | 2.008(4)   | Zn(2)-O(5) <sup>#2</sup>                      | 2.332(4)   |
| Zn(2)-O(7)                                    | 1.964(4)   | Zn(2)-N(4) <sup>#3</sup>                      | 2.051(4)   |
| O(1)-Zn(1)-O(6)                               | 101.30(16) | O(5) <sup>#2</sup> -Zn(2)-N(4) <sup>#3</sup>  | 91.94(15)  |
| O(1)-Zn(1)-O(9) <sup>#1</sup>                 | 88.97(15)  | O(1)-Zn(1)-O(10) <sup>#1</sup>                | 132.29(16) |
| O(6)-Zn(1)-O(9) <sup>#1</sup>                 | 161.00(14) | O(6)-Zn(1)-O(10) <sup>#1</sup>                | 102.05(15) |
| O(9) <sup>#1</sup> -Zn(1)-O(10) <sup>#1</sup> | 59.83(14)  | O(5) <sup>#2</sup> -Zn(2)-O(2)                | 159.84(14) |
| O(2)-Zn(2)-N(4) <sup>#3</sup>                 | 98.12(16)  | O(4) <sup>#2</sup> -Zn(2)-O(2)                | 100.44(15) |
| O(4) <sup>#2</sup> -Zn(2)-O(5) <sup>#2</sup>  | 60.14(14)  | O(2)-Zn(2)-O(7)                               | 102.60(15) |
| O(4) <sup>#2</sup> -Zn(2)-O(7)                | 142.52(16) | O(5) <sup>#2</sup> -Zn(2)-O(7)                | 91.99(14)  |
| O(4) <sup>#2</sup> -Zn(2)-N(4) <sup>#3</sup>  | 102.47(16) | N(4) <sup>#3</sup> -Zn(2)-O(7)                | 103.05(16) |
| O(1)-Zn(1)-N(1)                               | 104.84(16) | N(1)-Zn(1)-O(6)                               | 100.11(15) |
| O(9) <sup>#1</sup> -Zn(1)-N(1)                | 92.50(15)  | O(10) <sup>#1</sup> -Zn(1)-N(1)               | 111.15(16) |
| <b>3</b>                                      |            |                                               |            |
| Zn(1)-O(1)                                    | 1.965(3)   | Zn(1)-N(1)                                    | 2.049(4)   |
| Zn(1)-O(9) <sup>#1</sup>                      | 2.014(4)   | Zn(1)-O(10) <sup>#1</sup>                     | 2.311(5)   |
| Zn(1)-O(6)                                    | 1.997(4)   | Zn(2)-N(5)                                    | 2.021(4)   |
| Zn(2)-O(4) <sup>#2</sup>                      | 2.464(4)   | Zn(2)-O(5) <sup>#2</sup>                      | 1.962(4)   |
| Zn(2)-O(7)                                    | 1.950(4)   | Zn(2)-O(2)                                    | 1.981(3)   |
| O(1)-Zn(1)-O(6)                               | 100.74(17) | O(1)-Zn(1)-N(1)                               | 98.96(17)  |
| O(1)-Zn(1)-O(9) <sup>#1</sup>                 | 145.28(17) | O(1)-Zn(1)-O(10) <sup>#1</sup>                | 95.80(15)  |
| O(6)-Zn(1)-O(9) <sup>#1</sup>                 | 96.78(17)  | O(6)-Zn(1)-O(10) <sup>#1</sup>                | 155.03(16) |
| O(6)-Zn(1)-N(1)                               | 103.24(18) | O(9) <sup>#1</sup> -Zn(1)-O(10) <sup>#1</sup> | 59.82(16)  |
| O(9) <sup>#1</sup> -Zn(1)-N(1)                | 105.90(18) | O(10) <sup>#1</sup> -Zn(1)-N(1)               | 92.42(17)  |
| O(4) <sup>#2</sup> -Zn(2)-O(2)                | 163.06(15) | O(2)-Zn(2)-N(5)                               | 98.84(15)  |
| O(5) <sup>#2</sup> -Zn(2)-O(2)                | 105.38(15) | O(4) <sup>#2</sup> -Zn(2)-O(5) <sup>#2</sup>  | 58.15(15)  |
| O(5) <sup>#2</sup> -Zn(2)-N(5)                | 113.99(16) | O(2)-Zn(2)-O(7)                               | 103.46(16) |
| O(4) <sup>#2</sup> -Zn(2)-O(7)                | 85.04(16)  | O(5) <sup>#2</sup> -Zn(2)-O(7)                | 123.98(17) |
| O(7)-Zn(2)-N(5)                               | 107.56(17) | N(5)-Zn(2)-O(4) <sup>#2</sup>                 | 92.34(15)  |

|                                              |            |                                              |            |
|----------------------------------------------|------------|----------------------------------------------|------------|
| Zn(1)-O(1)                                   | 2.035(3)   | Zn(1)-N(1)                                   | 2.029(4)   |
| Zn(1)-O(6) <sup>#1</sup>                     | 2.039(3)   | Zn(1)-O(1) <sup>#2</sup>                     | 2.035(3)   |
| Zn(1)-O(6) <sup>#3</sup>                     | 2.039(3)   | Zn(2)-O(2) <sup>#3</sup>                     | 2.058(2)   |
| Zn(2)-N(4) <sup>#6</sup>                     | 2.015(4)   | Zn(2)-O(2) <sup>#4</sup>                     | 2.058(2)   |
| Zn(2)-O(5)                                   | 2.052(3)   | Zn(2)-O(5) <sup>#5</sup>                     | 2.052(3)   |
| O(1)-Zn(1)-N(1)                              | 97.72(8)   | N(1)-Zn(1)-O(6) <sup>#3</sup>                | 104.70(8)  |
| O(1) <sup>#2</sup> -Zn(1)-O(6) <sup>#3</sup> | 89.73(13)  | O(2) <sup>#3</sup> -Zn(2)-O(5)               | 86.30(12)  |
| O(1)-Zn(1)-O(6) <sup>#3</sup>                | 86.36(13)  | O(2) <sup>#4</sup> -Zn(2)-N(4) <sup>#6</sup> | 104.48(7)  |
| O(2) <sup>#4</sup> -Zn(2)-O(5)               | 89.97(12)  | O(5)-Zn(2)-N(4) <sup>#6</sup>                | 97.47(8)   |
| O(1) <sup>#2</sup> -Zn(1)-O(1)               | 164.55(16) | O(1) <sup>#2</sup> -Zn(1)-O(6) <sup>#1</sup> | 86.36(13)  |
| O(1)-Zn(1)-O(6) <sup>#1</sup>                | 89.73(13)  | O(6) <sup>#3</sup> -Zn(1)-O(6) <sup>#1</sup> | 150.60(16) |
| O(1) <sup>#2</sup> -Zn(1)-N(1)               | 97.72(8)   | N(1)-Zn(1)-O(6) <sup>#1</sup>                | 104.70(8)  |
| O(2) <sup>#4</sup> -Zn(2)-O(2) <sup>#3</sup> | 151.04(15) | O(5) <sup>#5</sup> -Zn(2)-O(2) <sup>#4</sup> | 86.30(12)  |
| O(5)-Zn(2)-O(5) <sup>#5</sup>                | 165.07(15) | O(5)-Zn(2)-O(2) <sup>#3</sup>                | 89.97(12)  |
| O(2) <sup>#3</sup> -Zn(2)-N(4) <sup>#6</sup> | 104.48(8)  | O(5) <sup>#5</sup> -Zn(2)-N(4) <sup>#6</sup> | 97.47(8)   |

<sup>a</sup>Symmetry codes for **1**: <sup>#1</sup>  $2 - x, 1 - y, z$ ; <sup>#2</sup>  $3/2 - x, 3/2 - y, 3/2 - z$ ; <sup>#3</sup>  $x - 1/2, y + 1/2, 3/2 - z$ ; <sup>#4</sup>  $3/2 - x, y, 3/4 - z$ ; <sup>#5</sup>  $1 - x, -y, z$ ; <sup>#6</sup>  $1/2 - x, 1/2 - y, 3/2 - z$ . Symmetry codes for **2**: <sup>#1</sup>  $x - 1/2, y + 1/2, z$ ; <sup>#2</sup>  $x + 1/2, y + 1/2, z$ ; <sup>#3</sup>  $1 + x, 1 - y, 3/2 + z$ ; <sup>#4</sup>  $x - 1/2, y - 1/2, z$ ; <sup>#5</sup>  $x + 1/2, y - 1/2, z$ ; <sup>#6</sup>  $-1 + x, 1 - y, -3/2 + z$ . Symmetry codes for **3**: <sup>#1</sup>  $x, -1 + y, z$ ; <sup>#2</sup>  $-1 + x, -1 + y, z$ ; <sup>#3</sup>  $1 + x, 1 + y, z$ ; <sup>#4</sup>  $x, 1 + y, z$ ; <sup>#5</sup>  $-1 - x, -y, -1 - z$ . Symmetry codes for **4**: <sup>#1</sup>  $1 + x, y, z$ ; <sup>#2</sup>  $5/2 - x, y, 1 - z$ ; <sup>#3</sup>  $3/2 - x, y, 1 - z$ ; <sup>#4</sup>  $-1 + x, y, z$ ; <sup>#5</sup>  $1/2 - x, y, 1 - z$ ; <sup>#6</sup>  $-1 + x, 1 + y, z$ ; <sup>#7</sup>  $1 + x, -1 + y, z$ .

**Table S2** The details data of  $K_{\text{obs}}$  for the degradation of organic dye.

| Complex  | $K_{\text{obs}}$ ( $\text{min}^{-1}$ ) for RhB | $K_{\text{obs}}$ ( $\text{min}^{-1}$ ) for MB | $K_{\text{obs}}$ ( $\text{min}^{-1}$ ) for CV |
|----------|------------------------------------------------|-----------------------------------------------|-----------------------------------------------|
| <b>1</b> | 0.0024                                         | 0.0028                                        | 0.0024                                        |
| <b>2</b> | 0.0184                                         | 0.0065                                        | 0.0044                                        |
| <b>3</b> | 0.0104                                         | 0.0034                                        | 0.0013                                        |
| <b>4</b> | 0.0073                                         | 0.0036                                        | 0.0026                                        |

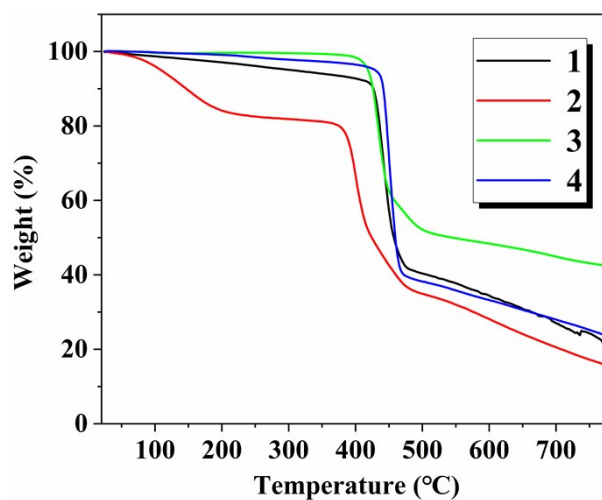

**Fig. S1** TGA curves of complexes **1-4**.

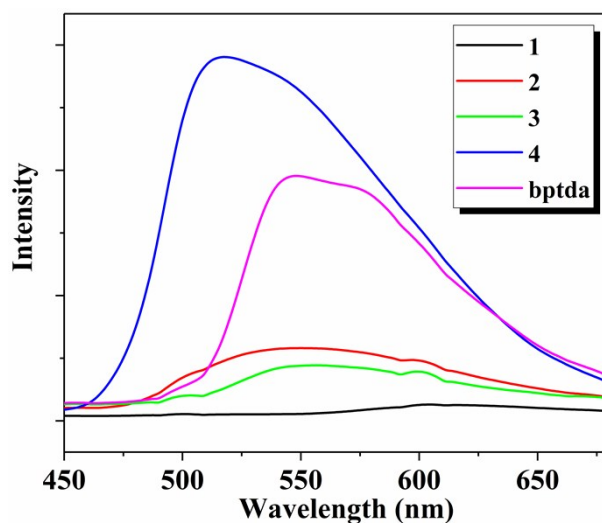

Fig. S2 Fluorescence spectra of complexes 1–4 and the bptda ligand.

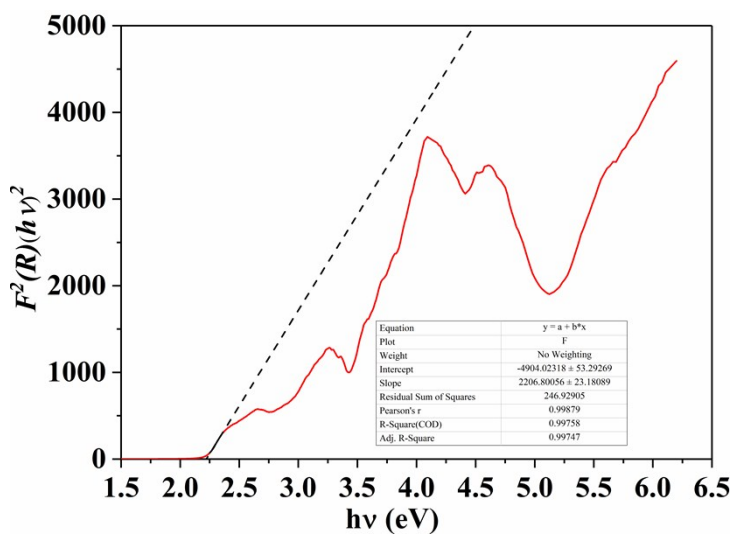

(a)

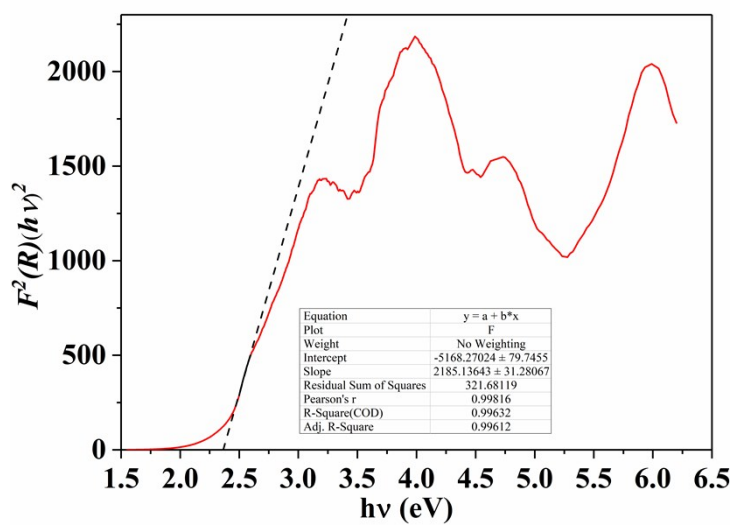

(b)

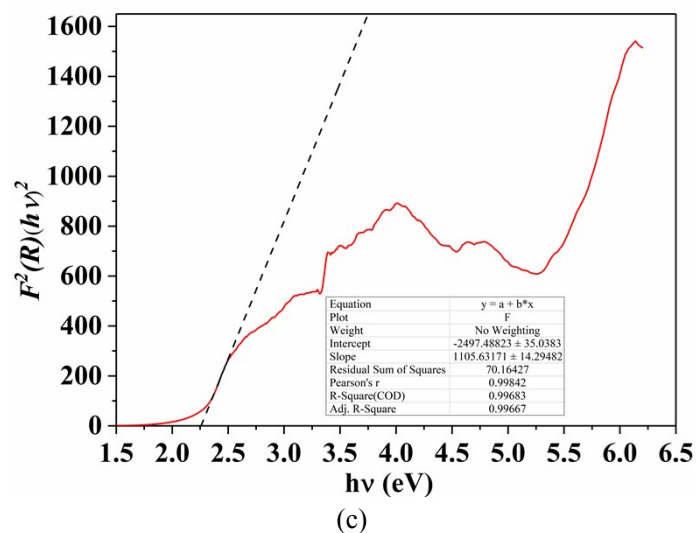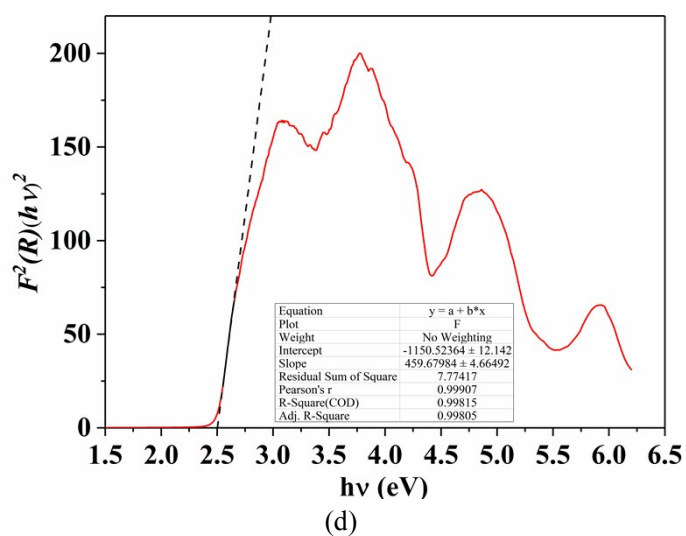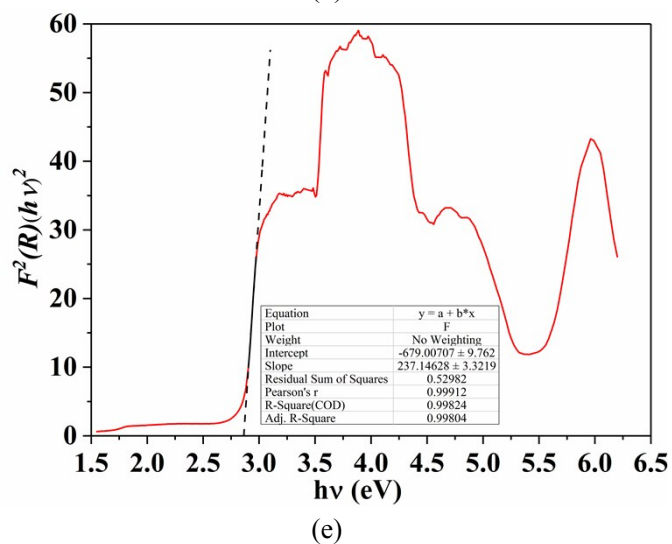

**Fig. S3** Tauc plots for complexes **1** (a), **2** (b), **3**, (c), **4** (d) and **4c** (e) at room temperature, the dashed lines represent fits of the linear regions.

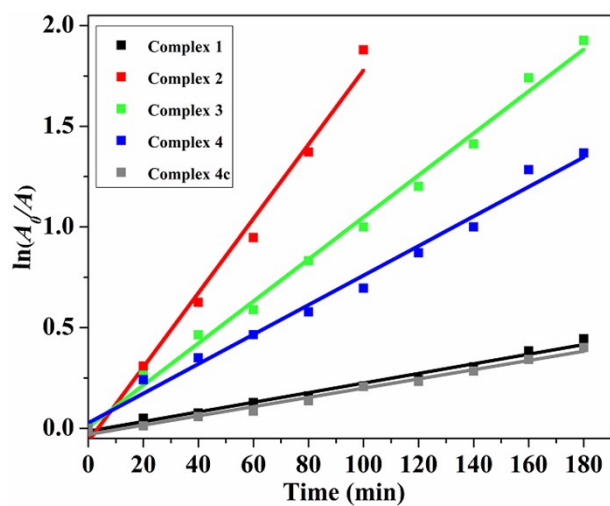

Fig. S4 The plot of  $\ln(A_0/A)$  versus time.

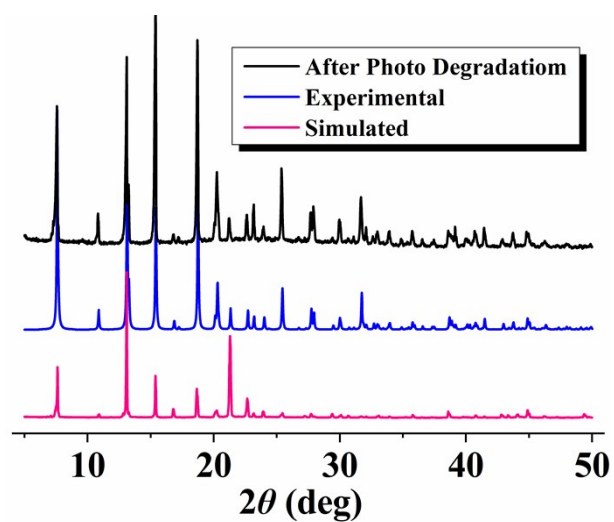

(a)

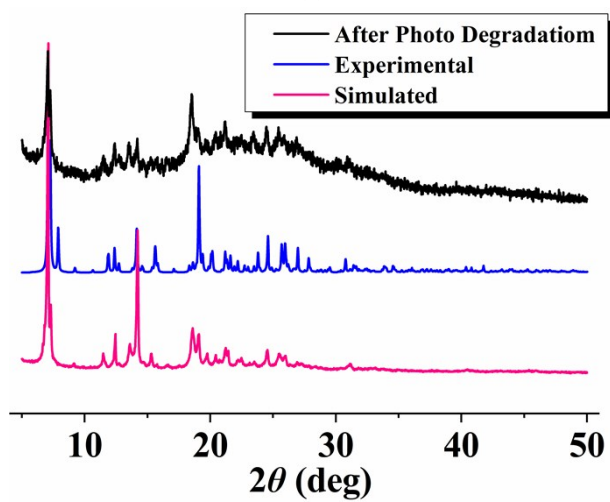

(b)

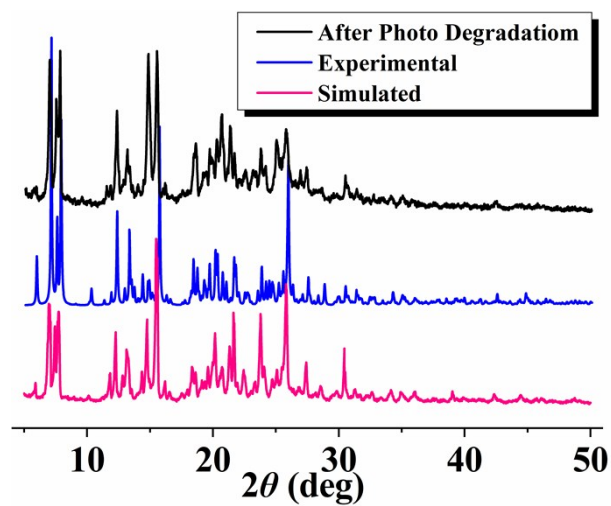

(c)

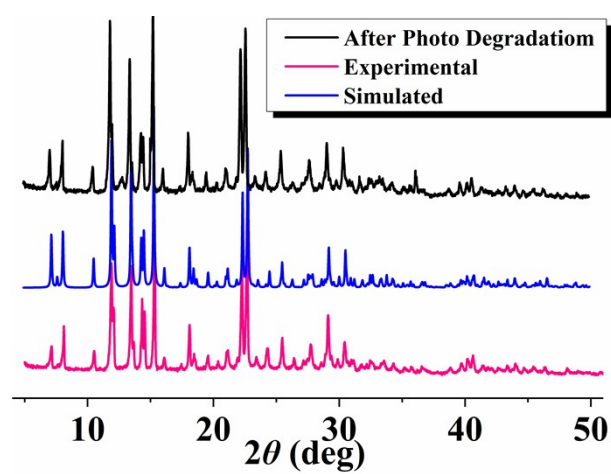

(d)

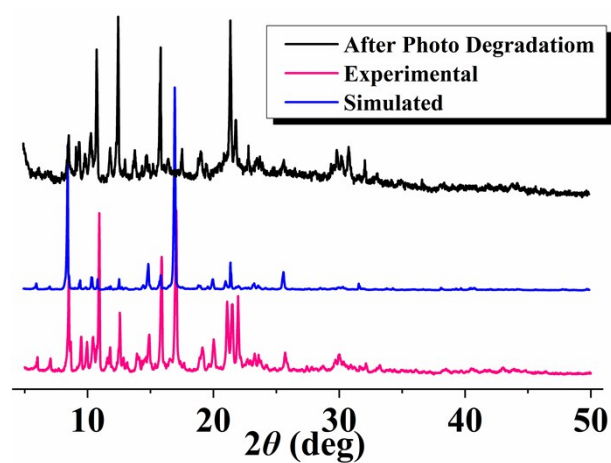

(e)

**Fig. S5** PXRd patterns of complexes **1** (a), **2** (b), **3**, (c), **4** (d) and **4c** (e) before and after photo degradation.

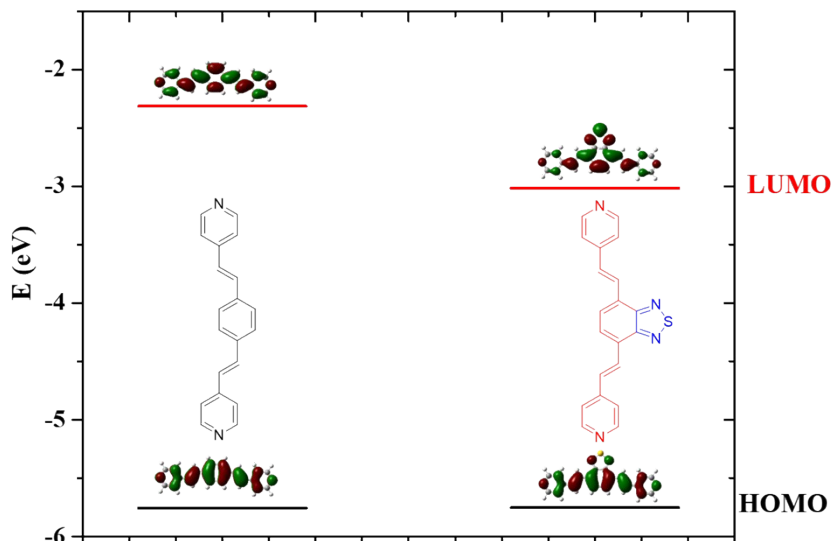

Fig. S6 HOMO and LUMO of the ligands.

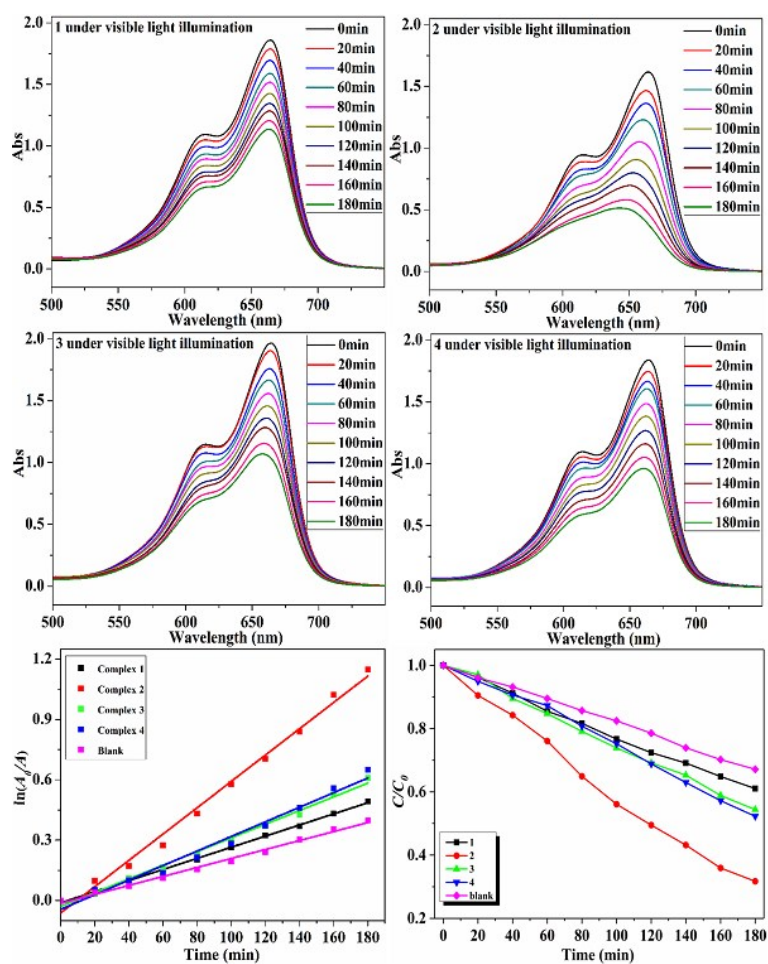

Fig. S7 UV-visible spectral changes of MB aqueous solution, the plot of  $\ln(A_0/A)$  versus time, and the degradation curve during the photocatalytic degradation reactions in presence of the complexes 1–4; the purple curve is the control experiment without any catalyst.



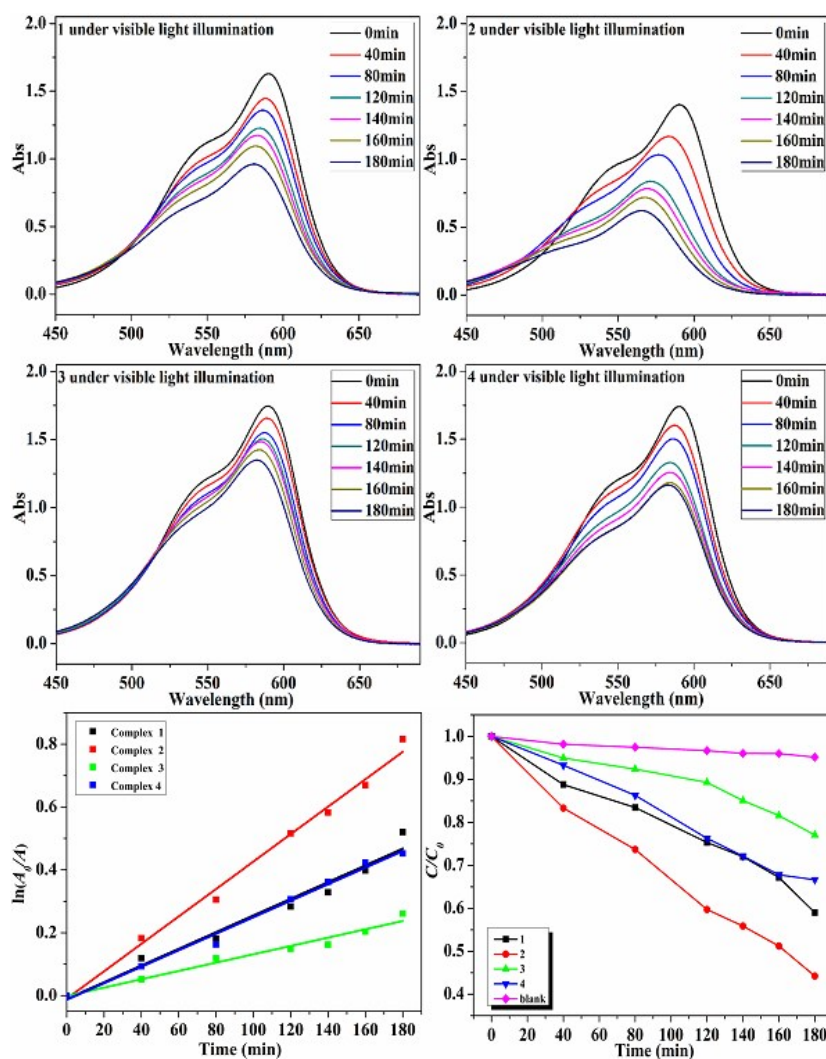

**Fig. S8** UV-visible spectral changes of CV aqueous solution, the plot of  $\ln(A_0/A)$  versus time, and the degradation curve during the photocatalytic degradation reactions in presence of the complexes 1–4; the purple curve is the control experiment without any catalyst.

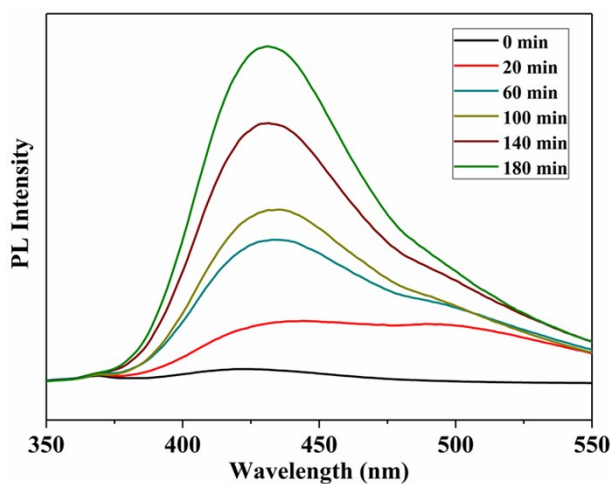

**Fig. S9** Photoluminescence spectral changes of the basic solution of terephthalic acid with light irradiation time on complex 4 (excitation at 325 nm)
